# Supplementary material for: Dosimetry of [212Pb]VMT01, a MC1R-Targeted Alpha Therapeutic Compound, and Effect of Free 208Tl on Tissue Absorbed Doses
Source: MDPI journal article supplement (doi:10.3390/molecules27185831), 2022-09-08
Supplement: s1 [file s1]

**SUPPLEMENTARY MATERIAL - Dosimetry of [<sup>212</sup>Pb]VMT01, a MC1R-targeted Alpha Therapeutic Compound, and Effect of Free <sup>208</sup>Tl on Tissue Absorbed Doses - Orcutt KD *et al***

**Supplemental Table S1. Organ/tissue activity concentrations (%ID/g) of [203Pb]VMT01 in female CD-1 IGS naïve mice.**

| Organ                     |      | Time (hr)             |                       |                       |                       |                       |                       |                       |
|---------------------------|------|-----------------------|-----------------------|-----------------------|-----------------------|-----------------------|-----------------------|-----------------------|
|                           |      | 0.5                   | 1                     | 2                     | 4                     | 6                     | 24                    | 55                    |
| Adrenals                  | Mean | $6.42 \times 10^{-1}$ | $3.46 \times 10^{-1}$ | $0.00 \times 10^0$    | $6.77 \times 10^{-2}$ | $0.00 \times 10^0$    | $0.00 \times 10^0$    | $0.00 \times 10^0$    |
|                           | SEM  | $1.36 \times 10^{-1}$ | $1.29 \times 10^{-1}$ | $0.00 \times 10^0$    | $2.98 \times 10^{-2}$ | $0.00 \times 10^0$    | $0.00 \times 10^0$    | $0.00 \times 10^0$    |
| Bladder wall              | Mean | $5.88 \times 10^0$    | $1.16 \times 10^0$    | $4.92 \times 10^{-1}$ | $1.52 \times 10^{-1}$ | $1.33 \times 10^{-2}$ | $0.00 \times 10^0$    | $3.05 \times 10^{-3}$ |
|                           | SEM  | $2.87 \times 10^0$    | $5.61 \times 10^{-1}$ | $3.10 \times 10^{-1}$ | $5.97 \times 10^{-2}$ | $7.84 \times 10^{-3}$ | $0.00 \times 10^0$    | $3.05 \times 10^{-3}$ |
| Blood (whole)             | Mean | $1.18 \times 10^0$    | $3.35 \times 10^{-1}$ | $2.14 \times 10^{-2}$ | $4.24 \times 10^{-2}$ | $2.23 \times 10^{-3}$ | $0.00 \times 10^0$    | $3.61 \times 10^{-2}$ |
|                           | SEM  | $2.51 \times 10^{-1}$ | $1.43 \times 10^{-1}$ | $9.59 \times 10^{-3}$ | $2.69 \times 10^{-3}$ | $2.23 \times 10^{-3}$ | $0.00 \times 10^0$    | $7.11 \times 10^{-3}$ |
| Carcass                   | Mean | $1.22 \times 10^0$    | $4.31 \times 10^{-1}$ | -                     | $1.57 \times 10^{-1}$ | -                     | -                     | -                     |
|                           | SEM  | $2.11 \times 10^{-1}$ | $1.27 \times 10^{-1}$ | -                     | $3.38 \times 10^{-2}$ | -                     | -                     | -                     |
| Bone                      | Mean | $7.17 \times 10^{-1}$ | $1.99 \times 10^{-1}$ | $3.14 \times 10^{-2}$ | $2.00 \times 10^{-1}$ | $3.13 \times 10^{-2}$ | $5.91 \times 10^{-3}$ | $2.96 \times 10^{-3}$ |
|                           | SEM  | $1.87 \times 10^{-1}$ | $5.14 \times 10^{-2}$ | $2.19 \times 10^{-2}$ | $6.58 \times 10^{-2}$ | $2.02 \times 10^{-2}$ | $3.96 \times 10^{-3}$ | $2.96 \times 10^{-3}$ |
| Bone Marrow               | Mean | $6.85 \times 10^{-2}$ | $1.59 \times 10^{-1}$ | $0.00 \times 10^0$    | $9.94 \times 10^{-2}$ | $0.00 \times 10^0$    | $0.00 \times 10^0$    | $0.00 \times 10^0$    |
|                           | SEM  | $6.85 \times 10^{-2}$ | $1.59 \times 10^{-1}$ | $0.00 \times 10^0$    | $9.94 \times 10^{-2}$ | $0.00 \times 10^0$    | $0.00 \times 10^0$    | $0.00 \times 10^0$    |
| Brain                     | Mean | $4.61 \times 10^{-2}$ | $1.68 \times 10^{-2}$ | $0.00 \times 10^0$    | $4.08 \times 10^{-3}$ | $2.52 \times 10^{-4}$ | $0.00 \times 10^0$    | $4.75 \times 10^{-4}$ |
|                           | SEM  | $5.43 \times 10^{-3}$ | $4.48 \times 10^{-3}$ | $0.00 \times 10^0$    | $1.20 \times 10^{-3}$ | $2.52 \times 10^{-4}$ | $0.00 \times 10^0$    | $4.75 \times 10^{-4}$ |
| Cecum                     | Mean | $2.66 \times 10^{-1}$ | $9.60 \times 10^{-2}$ | $2.15 \times 10^{-1}$ | $5.46 \times 10^{-1}$ | $1.77 \times 10^0$    | $4.74 \times 10^{-1}$ | $1.18 \times 10^{-1}$ |
|                           | SEM  | $5.71 \times 10^{-2}$ | $2.06 \times 10^{-2}$ | $5.65 \times 10^{-2}$ | $2.38 \times 10^{-1}$ | $5.42 \times 10^{-1}$ | $1.63 \times 10^{-1}$ | $5.85 \times 10^{-2}$ |
| Eyes                      | Mean | $4.78 \times 10^{-1}$ | $1.33 \times 10^{-1}$ | $4.04 \times 10^{-3}$ | $6.29 \times 10^{-2}$ | $2.89 \times 10^{-3}$ | $0.00 \times 10^0$    | $3.29 \times 10^{-3}$ |
|                           | SEM  | $1.69 \times 10^{-1}$ | $1.42 \times 10^{-2}$ | $2.21 \times 10^{-3}$ | $1.98 \times 10^{-2}$ | $2.89 \times 10^{-3}$ | $0.00 \times 10^0$    | $3.29 \times 10^{-3}$ |
| Gallbladder               | Mean | $5.28 \times 10^{-1}$ | $1.06 \times 10^{-1}$ | $0.00 \times 10^0$    | $1.27 \times 10^{-1}$ | $0.00 \times 10^0$    | $0.00 \times 10^0$    | $2.69 \times 10^{-2}$ |
|                           | SEM  | $2.76 \times 10^{-1}$ | $3.85 \times 10^{-2}$ | $0.00 \times 10^0$    | $6.58 \times 10^{-2}$ | $0.00 \times 10^0$    | $0.00 \times 10^0$    | $2.69 \times 10^{-2}$ |
| Heart                     | Mean | $5.91 \times 10^{-1}$ | $1.67 \times 10^{-1}$ | $1.98 \times 10^{-2}$ | $3.31 \times 10^{-2}$ | $6.42 \times 10^{-3}$ | $7.64 \times 10^{-3}$ | $1.65 \times 10^{-3}$ |
|                           | SEM  | $1.22 \times 10^{-1}$ | $6.38 \times 10^{-2}$ | $2.03 \times 10^{-3}$ | $5.75 \times 10^{-3}$ | $2.95 \times 10^{-3}$ | $4.63 \times 10^{-3}$ | $1.09 \times 10^{-3}$ |
| Kidneys                   | Mean | $6.24 \times 10^0$    | $4.89 \times 10^0$    | $4.28 \times 10^0$    | $4.51 \times 10^0$    | $4.65 \times 10^0$    | $2.72 \times 10^0$    | $1.09 \times 10^0$    |
|                           | SEM  | $3.51 \times 10^{-1}$ | $2.50 \times 10^{-1}$ | $4.45 \times 10^{-1}$ | $6.62 \times 10^{-1}$ | $4.28 \times 10^{-1}$ | $4.54 \times 10^{-1}$ | $1.21 \times 10^{-1}$ |
| Large intestines          | Mean | $8.01 \times 10^{-1}$ | $4.60 \times 10^{-1}$ | $1.28 \times 10^{-1}$ | $2.85 \times 10^{-1}$ | $3.30 \times 10^{-1}$ | $1.50 \times 10^{-1}$ | $4.28 \times 10^{-2}$ |
|                           | SEM  | $1.55 \times 10^{-1}$ | $1.23 \times 10^{-1}$ | $4.26 \times 10^{-2}$ | $9.82 \times 10^{-2}$ | $1.40 \times 10^{-1}$ | $5.87 \times 10^{-2}$ | $1.69 \times 10^{-2}$ |
| Large intestines contents | Mean | $3.26 \times 10^{-2}$ | $3.27 \times 10^{-2}$ | $7.47 \times 10^{-2}$ | $1.26 \times 10^0$    | $3.03 \times 10^0$    | $1.58 \times 10^0$    | $1.78 \times 10^{-1}$ |
|                           | SEM  | $1.43 \times 10^{-2}$ | $1.17 \times 10^{-2}$ | $4.01 \times 10^{-2}$ | $7.62 \times 10^{-1}$ | $1.18 \times 10^0$    | $7.13 \times 10^{-1}$ | $1.08 \times 10^{-1}$ |
| Liver                     | Mean | $6.88 \times 10^{-1}$ | $5.16 \times 10^{-1}$ | $3.33 \times 10^{-1}$ | $4.96 \times 10^{-1}$ | $3.50 \times 10^{-1}$ | $2.40 \times 10^{-1}$ | $2.13 \times 10^{-1}$ |
|                           | SEM  | $7.53 \times 10^{-2}$ | $2.48 \times 10^{-2}$ | $2.08 \times 10^{-2}$ | $6.22 \times 10^{-2}$ | $3.93 \times 10^{-2}$ | $2.42 \times 10^{-2}$ | $3.27 \times 10^{-2}$ |
| Lungs                     | Mean | $1.39 \times 10^0$    | $8.61 \times 10^{-1}$ | $1.06 \times 10^{-1}$ | $1.13 \times 10^{-1}$ | $6.10 \times 10^{-2}$ | $1.44 \times 10^{-2}$ | $1.28 \times 10^{-1}$ |
|                           | SEM  | $2.29 \times 10^{-1}$ | $1.95 \times 10^{-1}$ | $1.44 \times 10^{-2}$ | $2.28 \times 10^{-2}$ | $2.62 \times 10^{-2}$ | $7.57 \times 10^{-3}$ | $8.00 \times 10^{-2}$ |
| Muscle                    | Mean | $3.22 \times 10^{-1}$ | $1.12 \times 10^{-1}$ | $4.06 \times 10^{-3}$ | $5.07 \times 10^{-2}$ | $5.94 \times 10^{-2}$ | $0.00 \times 10^0$    | $0.00 \times 10^0$    |
|                           | SEM  | $5.22 \times 10^{-2}$ | $4.58 \times 10^{-2}$ | $4.06 \times 10^{-3}$ | $2.15 \times 10^{-2}$ | $5.94 \times 10^{-2}$ | $0.00 \times 10^0$    | $0.00 \times 10^0$    |
| Ovaries                   | Mean | $5.27 \times 10^{-1}$ | $2.47 \times 10^{-1}$ | $2.84 \times 10^{-2}$ | $5.39 \times 10^{-2}$ | $1.05 \times 10^{-2}$ | $3.91 \times 10^{-2}$ | $2.49 \times 10^{-2}$ |
|                           | SEM  | $3.54 \times 10^{-2}$ | $7.41 \times 10^{-2}$ | $1.80 \times 10^{-2}$ | $1.05 \times 10^{-2}$ | $6.52 \times 10^{-3}$ | $1.96 \times 10^{-2}$ | $7.79 \times 10^{-3}$ |
| Pancreas                  | Mean | $3.87 \times 10^{-1}$ | $1.28 \times 10^{-1}$ | $1.53 \times 10^{-2}$ | $5.30 \times 10^{-2}$ | $6.59 \times 10^{-3}$ | $4.10 \times 10^{-3}$ | $1.60 \times 10^{-3}$ |
|                           | SEM  | $7.93 \times 10^{-2}$ | $4.15 \times 10^{-2}$ | $7.47 \times 10^{-3}$ | $1.47 \times 10^{-2}$ | $3.90 \times 10^{-3}$ | $4.10 \times 10^{-3}$ | $1.60 \times 10^{-3}$ |
| Skin                      | Mean | $3.18 \times 10^0$    | $5.60 \times 10^{-1}$ | $3.46 \times 10^{-1}$ | $3.22 \times 10^{-1}$ | $1.87 \times 10^{-1}$ | $5.12 \times 10^{-2}$ | $2.04 \times 10^{-2}$ |
|                           | SEM  | $1.02 \times 10^0$    | $1.51 \times 10^{-1}$ | $8.25 \times 10^{-2}$ | $1.26 \times 10^{-1}$ | $5.22 \times 10^{-2}$ | $1.01 \times 10^{-2}$ | $1.16 \times 10^{-2}$ |
| Small intestines          | Mean | $5.50 \times 10^{-1}$ | $2.58 \times 10^{-1}$ | $4.55 \times 10^{-1}$ | $1.01 \times 10^{-1}$ | $2.90 \times 10^{-1}$ | $6.01 \times 10^{-2}$ | $2.28 \times 10^{-2}$ |
|                           | SEM  | $1.05 \times 10^{-1}$ | $6.73 \times 10^{-2}$ | $7.85 \times 10^{-2}$ | $8.59 \times 10^{-3}$ | $8.40 \times 10^{-2}$ | $1.94 \times 10^{-2}$ | $1.18 \times 10^{-3}$ |
| Small intestines Contents | Mean | $1.94 \times 10^{-1}$ | $1.83 \times 10^{-1}$ | $2.52 \times 10^0$    | $1.73 \times 10^{-1}$ | $2.10 \times 10^0$    | $3.48 \times 10^{-1}$ | $1.74 \times 10^{-1}$ |
|                           | SEM  | $2.49 \times 10^{-2}$ | $1.25 \times 10^{-2}$ | $8.66 \times 10^{-1}$ | $4.38 \times 10^{-2}$ | $8.71 \times 10^{-1}$ | $1.96 \times 10^{-1}$ | $3.68 \times 10^{-2}$ |
| Spleen                    | Mean | $4.43 \times 10^{-1}$ | $3.77 \times 10^{-1}$ | $1.21 \times 10^{-1}$ | $3.94 \times 10^{-1}$ | $8.03 \times 10^{-2}$ | $6.21 \times 10^{-2}$ | $1.34 \times 10^{-1}$ |
|                           | SEM  | $6.59 \times 10^{-2}$ | $3.84 \times 10^{-2}$ | $2.94 \times 10^{-2}$ | $1.59 \times 10^{-1}$ | $1.91 \times 10^{-2}$ | $1.94 \times 10^{-2}$ | $5.75 \times 10^{-2}$ |
| Stomach Contents          | Mean | $1.33 \times 10^{-1}$ | $4.39 \times 10^{-2}$ | $2.06 \times 10^0$    | $3.86 \times 10^{-2}$ | $8.39 \times 10^{-1}$ | $1.09 \times 10^{-1}$ | $3.72 \times 10^{-2}$ |
|                           | SEM  | $2.11 \times 10^{-2}$ | $2.14 \times 10^{-3}$ | $5.91 \times 10^{-1}$ | $1.57 \times 10^{-2}$ | $6.40 \times 10^{-1}$ | $8.46 \times 10^{-2}$ | $1.34 \times 10^{-2}$ |
| Stomach Wall              | Mean | $7.04 \times 10^{-1}$ | $3.16 \times 10^{-1}$ | $5.57 \times 10^{-1}$ | $1.44 \times 10^{-1}$ | $3.43 \times 10^{-1}$ | $1.08 \times 10^{-1}$ | $4.02 \times 10^{-2}$ |
|                           | SEM  | $1.42 \times 10^{-1}$ | $4.06 \times 10^{-2}$ | $1.91 \times 10^{-1}$ | $2.07 \times 10^{-2}$ | $1.55 \times 10^{-1}$ | $3.58 \times 10^{-2}$ | $6.82 \times 10^{-3}$ |
| Thymus                    | Mean | $4.84 \times 10^{-1}$ | $1.38 \times 10^{-1}$ | $2.16 \times 10^{-2}$ | $6.27 \times 10^{-2}$ | $1.81 \times 10^{-3}$ | $0.00 \times 10^0$    | $9.73 \times 10^{-3}$ |
|                           | SEM  | $9.42 \times 10^{-2}$ | $5.76 \times 10^{-2}$ | $2.16 \times 10^{-2}$ | $2.75 \times 10^{-2}$ | $1.81 \times 10^{-3}$ | $0.00 \times 10^0$    | $9.73 \times 10^{-3}$ |
| Thyroid                   | Mean | $1.06 \times 10^0$    | $4.29 \times 10^{-1}$ | $0.00 \times 10^0$    | $1.91 \times 10^{-1}$ | $0.00 \times 10^0$    | $0.00 \times 10^0$    | $3.80 \times 10^{-2}$ |
|                           | SEM  | $2.14 \times 10^{-1}$ | $1.87 \times 10^{-1}$ | $0.00 \times 10^0$    | $7.74 \times 10^{-2}$ | $0.00 \times 10^0$    | $0.00 \times 10^0$    | $3.80 \times 10^{-2}$ |

| Organ  |      | Time (hr)             |                       |                       |                       |                       |                       |                       |
|--------|------|-----------------------|-----------------------|-----------------------|-----------------------|-----------------------|-----------------------|-----------------------|
|        |      | 0.5                   | 1                     | 2                     | 4                     | 6                     | 24                    | 55                    |
| Uterus | Mean | $1.34 \times 10^0$    | $3.32 \times 10^{-1}$ | $1.00 \times 10^{-1}$ | $1.12 \times 10^{-1}$ | $5.36 \times 10^{-2}$ | $2.45 \times 10^{-2}$ | $1.53 \times 10^{-2}$ |
|        | SEM  | $2.50 \times 10^{-1}$ | $1.24 \times 10^{-1}$ | $2.28 \times 10^{-2}$ | $2.87 \times 10^{-2}$ | $6.06 \times 10^{-3}$ | $2.12 \times 10^{-2}$ | $4.52 \times 10^{-3}$ |

**Supplemental Table S2. Organ/tissue activity concentrations (%ID/g) of [203Pb]VMT01 in male CD-1 IGS naïve mice.**

| Organ                     |      | Time (hr)             |                       |                       |                       |                       |                       |                       |
|---------------------------|------|-----------------------|-----------------------|-----------------------|-----------------------|-----------------------|-----------------------|-----------------------|
|                           |      | 0.5                   | 1                     | 2                     | 4                     | 6                     | 24                    | 55                    |
| Adrenal glands            | Mean | $1.31 \times 10^0$    | $3.56 \times 10^0$    | $1.78 \times 10^{-2}$ | $2.10 \times 10^{-1}$ | $1.04 \times 10^{-1}$ | $0.00 \times 10^0$    | $0.00 \times 10^0$    |
|                           | SEM  | $7.49 \times 10^{-1}$ | $3.12 \times 10^0$    | $1.78 \times 10^{-2}$ | $1.74 \times 10^{-1}$ | $7.66 \times 10^{-2}$ | $0.00 \times 10^0$    | $0.00 \times 10^0$    |
| Bladder wall              | Mean | $2.64 \times 10^1$    | $2.92 \times 10^1$    | $7.37 \times 10^{-1}$ | $4.27 \times 10^0$    | $3.51 \times 10^0$    | $1.52 \times 10^{-2}$ | $0.00 \times 10^0$    |
|                           | SEM  | $1.01 \times 10^1$    | $1.59 \times 10^1$    | $5.18 \times 10^{-1}$ | $3.09 \times 10^0$    | $3.15 \times 10^0$    | $6.10 \times 10^{-3}$ | $0.00 \times 10^0$    |
| Blood whole               | Mean | $1.37 \times 10^0$    | $3.35 \times 10^{-1}$ | $5.85 \times 10^{-2}$ | $5.63 \times 10^{-3}$ | $4.21 \times 10^{-3}$ | $0.00 \times 10^0$    | $9.28 \times 10^{-3}$ |
|                           | SEM  | $3.00 \times 10^{-1}$ | $1.08 \times 10^{-1}$ | $1.05 \times 10^{-2}$ | $2.36 \times 10^{-3}$ | $4.21 \times 10^{-3}$ | $0.00 \times 10^0$    | $9.28 \times 10^{-3}$ |
| Remainder Body            | Mean | $8.47 \times 10^{-1}$ | $5.68 \times 10^{-1}$ | -                     | $1.70 \times 10^{-1}$ | $2.19 \times 10^{-1}$ | -                     | -                     |
|                           | SEM  | $1.05 \times 10^{-1}$ | $8.80 \times 10^{-2}$ | -                     | $1.06 \times 10^{-2}$ | $3.43 \times 10^{-2}$ | -                     | -                     |
| Bone                      | Mean | $4.62 \times 10^{-1}$ | $1.64 \times 10^{-1}$ | $1.35 \times 10^{-1}$ | $1.54 \times 10^{-1}$ | $4.76 \times 10^{-1}$ | $6.44 \times 10^{-3}$ | $3.72 \times 10^{-2}$ |
|                           | SEM  | $1.02 \times 10^{-1}$ | $7.16 \times 10^{-2}$ | $7.79 \times 10^{-2}$ | $2.88 \times 10^{-2}$ | $2.65 \times 10^{-1}$ | $4.19 \times 10^{-3}$ | $3.72 \times 10^{-2}$ |
| Bone Marrow               | Mean | $0.00 \times 10^0$    | $0.00 \times 10^0$    | $0.00 \times 10^0$    | $1.54 \times 10^{-2}$ | $5.25 \times 10^{-4}$ | $0.00 \times 10^0$    | $0.00 \times 10^0$    |
|                           | SEM  | $0.00 \times 10^0$    | $0.00 \times 10^0$    | $0.00 \times 10^0$    | $1.54 \times 10^{-2}$ | $5.25 \times 10^{-4}$ | $0.00 \times 10^0$    | $0.00 \times 10^0$    |
| Brain whole               | Mean | $4.48 \times 10^{-2}$ | $2.25 \times 10^{-2}$ | $2.36 \times 10^{-3}$ | $1.88 \times 10^{-2}$ | $1.18 \times 10^{-2}$ | $0.00 \times 10^0$    | $0.00 \times 10^0$    |
|                           | SEM  | $1.06 \times 10^{-2}$ | $6.84 \times 10^{-3}$ | $9.34 \times 10^{-4}$ | $5.41 \times 10^{-3}$ | $5.90 \times 10^{-3}$ | $0.00 \times 10^0$    | $0.00 \times 10^0$    |
| Cecum                     | Mean | $2.68 \times 10^{-1}$ | $1.18 \times 10^{-1}$ | $1.51 \times 10^{-1}$ | $2.33 \times 10^0$    | $1.70 \times 10^0$    | $1.04 \times 10^{-1}$ | $1.12 \times 10^0$    |
|                           | SEM  | $6.66 \times 10^{-2}$ | $2.48 \times 10^{-2}$ | $3.53 \times 10^{-2}$ | $3.83 \times 10^{-1}$ | $3.90 \times 10^{-1}$ | $2.91 \times 10^{-2}$ | $5.32 \times 10^{-1}$ |
| Eyes                      | Mean | $4.03 \times 10^{-1}$ | $1.55 \times 10^{-1}$ | $5.35 \times 10^{-2}$ | $8.41 \times 10^{-2}$ | $4.26 \times 10^{-2}$ | $0.00 \times 10^0$    | $0.00 \times 10^0$    |
|                           | SEM  | $7.24 \times 10^{-2}$ | $2.65 \times 10^{-2}$ | $1.30 \times 10^{-2}$ | $1.37 \times 10^{-2}$ | $4.12 \times 10^{-3}$ | $0.00 \times 10^0$    | $0.00 \times 10^0$    |
| Gallbladder               | Mean | $4.52 \times 10^{-1}$ | $2.68 \times 10^{-2}$ | $0.00 \times 10^0$    | $4.79 \times 10^{-2}$ | $3.52 \times 10^{-2}$ | $0.00 \times 10^0$    | $0.00 \times 10^0$    |
|                           | SEM  | $2.61 \times 10^{-1}$ | $2.68 \times 10^{-2}$ | $0.00 \times 10^0$    | $4.79 \times 10^{-2}$ | $3.52 \times 10^{-2}$ | $0.00 \times 10^0$    | $0.00 \times 10^0$    |
| Heart                     | Mean | $6.78 \times 10^{-1}$ | $1.75 \times 10^{-1}$ | $4.09 \times 10^{-2}$ | $2.04 \times 10^{-2}$ | $2.73 \times 10^{-2}$ | $8.77 \times 10^{-3}$ | $5.16 \times 10^{-3}$ |
|                           | SEM  | $1.28 \times 10^{-1}$ | $5.52 \times 10^{-2}$ | $7.20 \times 10^{-3}$ | $4.17 \times 10^{-3}$ | $1.51 \times 10^{-2}$ | $4.40 \times 10^{-3}$ | $2.60 \times 10^{-3}$ |
| Kidneys                   | Mean | $8.30 \times 10^0$    | $6.70 \times 10^0$    | $4.78 \times 10^0$    | $4.20 \times 10^0$    | $3.36 \times 10^0$    | $1.30 \times 10^0$    | $5.47 \times 10^{-1}$ |
|                           | SEM  | $1.90 \times 10^0$    | $4.78 \times 10^{-1}$ | $6.58 \times 10^{-1}$ | $5.67 \times 10^{-1}$ | $4.98 \times 10^{-1}$ | $2.76 \times 10^{-1}$ | $1.04 \times 10^{-1}$ |
| Large intestines          | Mean | $8.59 \times 10^{-1}$ | $6.70 \times 10^{-1}$ | $1.08 \times 10^{-1}$ | $9.77 \times 10^{-1}$ | $5.53 \times 10^{-1}$ | $4.57 \times 10^{-2}$ | $4.70 \times 10^{-1}$ |
|                           | SEM  | $2.25 \times 10^{-1}$ | $1.60 \times 10^{-1}$ | $2.48 \times 10^{-2}$ | $5.77 \times 10^{-1}$ | $1.06 \times 10^{-1}$ | $8.69 \times 10^{-3}$ | $2.43 \times 10^{-1}$ |
| Large intestines contents | Mean | $3.16 \times 10^{-2}$ | $8.36 \times 10^{-2}$ | $1.33 \times 10^{-1}$ | $4.66 \times 10^0$    | $4.71 \times 10^0$    | $1.91 \times 10^{-1}$ | $2.03 \times 10^0$    |
|                           | SEM  | $6.79 \times 10^{-3}$ | $4.70 \times 10^{-2}$ | $2.83 \times 10^{-2}$ | $1.81 \times 10^0$    | $1.09 \times 10^0$    | $7.10 \times 10^{-2}$ | $1.09 \times 10^0$    |
| Liver                     | Mean | $6.36 \times 10^{-1}$ | $3.48 \times 10^{-1}$ | $2.19 \times 10^{-1}$ | $2.68 \times 10^{-1}$ | $2.06 \times 10^{-1}$ | $1.75 \times 10^{-1}$ | $1.02 \times 10^{-1}$ |
|                           | SEM  | $3.43 \times 10^{-2}$ | $3.59 \times 10^{-2}$ | $4.09 \times 10^{-2}$ | $2.76 \times 10^{-2}$ | $2.26 \times 10^{-2}$ | $3.26 \times 10^{-2}$ | $2.61 \times 10^{-2}$ |
| Lungs                     | Mean | $2.15 \times 10^0$    | $4.96 \times 10^{-1}$ | $1.42 \times 10^{-1}$ | $1.65 \times 10^{-1}$ | $6.63 \times 10^{-2}$ | $3.25 \times 10^{-2}$ | $1.08 \times 10^{-2}$ |
|                           | SEM  | $3.80 \times 10^{-1}$ | $1.24 \times 10^{-1}$ | $1.91 \times 10^{-2}$ | $2.42 \times 10^{-2}$ | $1.00 \times 10^{-2}$ | $1.01 \times 10^{-2}$ | $9.87 \times 10^{-3}$ |
| Muscle                    | Mean | $3.36 \times 10^{-1}$ | $2.54 \times 10^{-1}$ | $5.39 \times 10^{-2}$ | $4.77 \times 10^{-2}$ | $4.11 \times 10^{-2}$ | $0.00 \times 10^0$    | $0.00 \times 10^0$    |
|                           | SEM  | $6.03 \times 10^{-2}$ | $5.76 \times 10^{-2}$ | $1.51 \times 10^{-2}$ | $1.13 \times 10^{-2}$ | $4.98 \times 10^{-3}$ | $0.00 \times 10^0$    | $0.00 \times 10^0$    |
| Pancreas                  | Mean | $4.97 \times 10^{-1}$ | $1.12 \times 10^{-1}$ | $3.02 \times 10^{-2}$ | $4.27 \times 10^{-2}$ | $1.04 \times 10^{-1}$ | $3.11 \times 10^{-3}$ | $0.00 \times 10^0$    |
|                           | SEM  | $6.69 \times 10^{-2}$ | $3.27 \times 10^{-2}$ | $8.78 \times 10^{-3}$ | $6.65 \times 10^{-3}$ | $7.25 \times 10^{-2}$ | $1.65 \times 10^{-3}$ | $0.00 \times 10^0$    |
| Skin                      | Mean | $1.12 \times 10^0$    | $6.63 \times 10^{-1}$ | $6.31 \times 10^{-1}$ | $1.94 \times 10^{-1}$ | $5.03 \times 10^{-1}$ | $2.52 \times 10^{-2}$ | $2.19 \times 10^{-2}$ |
|                           | SEM  | $1.66 \times 10^{-1}$ | $1.69 \times 10^{-1}$ | $2.76 \times 10^{-1}$ | $2.29 \times 10^{-2}$ | $1.54 \times 10^{-1}$ | $7.91 \times 10^{-3}$ | $9.02 \times 10^{-3}$ |
| Small intestines          | Mean | $6.43 \times 10^{-1}$ | $3.70 \times 10^{-1}$ | $3.46 \times 10^{-1}$ | $4.31 \times 10^{-1}$ | $2.56 \times 10^{-1}$ | $2.78 \times 10^{-2}$ | $2.74 \times 10^{-1}$ |
|                           | SEM  | $1.09 \times 10^{-1}$ | $3.48 \times 10^{-2}$ | $7.68 \times 10^{-2}$ | $1.48 \times 10^{-1}$ | $3.08 \times 10^{-2}$ | $3.60 \times 10^{-3}$ | $9.38 \times 10^{-2}$ |
| Small intestines Contents | Mean | $4.45 \times 10^{-1}$ | $6.83 \times 10^{-1}$ | $1.92 \times 10^0$    | $2.16 \times 10^0$    | $9.12 \times 10^{-1}$ | $4.01 \times 10^{-2}$ | $1.95 \times 10^0$    |
|                           | SEM  | $1.47 \times 10^{-1}$ | $1.48 \times 10^{-1}$ | $3.40 \times 10^{-1}$ | $4.17 \times 10^{-1}$ | $2.87 \times 10^{-1}$ | $8.01 \times 10^{-3}$ | $6.71 \times 10^{-1}$ |
| Spleen                    | Mean | $6.32 \times 10^{-1}$ | $1.94 \times 10^{-1}$ | $8.03 \times 10^{-2}$ | $1.83 \times 10^{-1}$ | $1.37 \times 10^{-1}$ | $7.47 \times 10^{-2}$ | $2.41 \times 10^{-2}$ |
|                           | SEM  | $3.69 \times 10^{-2}$ | $2.32 \times 10^{-2}$ | $2.16 \times 10^{-2}$ | $3.14 \times 10^{-2}$ | $3.68 \times 10^{-2}$ | $3.25 \times 10^{-3}$ | $2.41 \times 10^{-2}$ |
| Stomach Contents          | Mean | $6.54 \times 10^{-1}$ | $5.63 \times 10^{-1}$ | $2.49 \times 10^0$    | $5.74 \times 10^{-1}$ | $3.05 \times 10^{-1}$ | $1.59 \times 10^{-2}$ | $4.27 \times 10^{-1}$ |
|                           | SEM  | $2.85 \times 10^{-1}$ | $1.55 \times 10^{-1}$ | $6.86 \times 10^{-1}$ | $6.93 \times 10^{-2}$ | $3.86 \times 10^{-2}$ | $2.20 \times 10^{-3}$ | $2.60 \times 10^{-1}$ |
| Stomach Wall              | Mean | $8.56 \times 10^{-1}$ | $4.42 \times 10^{-1}$ | $8.56 \times 10^{-1}$ | $3.04 \times 10^{-1}$ | $1.94 \times 10^{-1}$ | $7.88 \times 10^{-2}$ | $1.35 \times 10^{-1}$ |
|                           | SEM  | $1.54 \times 10^{-1}$ | $6.77 \times 10^{-2}$ | $2.04 \times 10^{-1}$ | $6.51 \times 10^{-2}$ | $2.68 \times 10^{-2}$ | $3.15 \times 10^{-3}$ | $4.64 \times 10^{-2}$ |
| Testes                    | Mean | $4.12 \times 10^{-1}$ | $3.41 \times 10^{-1}$ | $1.51 \times 10^{-1}$ | $1.06 \times 10^{-1}$ | $7.57 \times 10^{-2}$ | $1.51 \times 10^{-2}$ | $4.19 \times 10^{-3}$ |
|                           | SEM  | $6.47 \times 10^{-2}$ | $1.62 \times 10^{-1}$ | $7.81 \times 10^{-2}$ | $7.30 \times 10^{-2}$ | $3.58 \times 10^{-2}$ | $1.10 \times 10^{-3}$ | $2.54 \times 10^{-3}$ |
| Thymus                    | Mean | $8.23 \times 10^{-1}$ | $1.36 \times 10^{-1}$ | $4.55 \times 10^{-2}$ | $1.35 \times 10^{-1}$ | $1.90 \times 10^{-2}$ | $0.00 \times 10^0$    | $0.00 \times 10^0$    |
|                           | SEM  | $1.32 \times 10^{-1}$ | $3.50 \times 10^{-2}$ | $1.17 \times 10^{-2}$ | $7.68 \times 10^{-2}$ | $8.70 \times 10^{-3}$ | $0.00 \times 10^0$    | $0.00 \times 10^0$    |

| Organ   |      | Time (hr)             |                       |                       |                       |                       |                    |                       |
|---------|------|-----------------------|-----------------------|-----------------------|-----------------------|-----------------------|--------------------|-----------------------|
|         |      | 0.5                   | 1                     | 2                     | 4                     | 6                     | 24                 | 55                    |
| Thyroid | Mean | $1.33 \times 10^0$    | $1.47 \times 10^{-1}$ | $6.36 \times 10^{-2}$ | $2.51 \times 10^{-1}$ | $2.51 \times 10^{-1}$ | $0.00 \times 10^0$ | $5.82 \times 10^{-2}$ |
|         | SEM  | $4.63 \times 10^{-1}$ | $8.11 \times 10^{-2}$ | $2.16 \times 10^{-2}$ | $5.13 \times 10^{-2}$ | $2.38 \times 10^{-1}$ | $0.00 \times 10^0$ | $5.82 \times 10^{-2}$ |
